# Supplementary material for: Exploring the possible role of satellite-based rainfall data to estimate inter‐ and intra‐annual global rainfall erosivity
Source: Copernicus journal article supplement (doi:10.5194/hess-2021-417), 2021-08-09
Supplement: Supplementary file 1 [file hess-2021-417-supplement.pdf]

# Exploring the possible role of satellite-based rainfall data to estimate inter- and intra-annual global rainfall erosivity

Nejc Bezak<sup>1</sup>, Pasquale Borrelli<sup>2,3</sup>, Panos Panagos<sup>4</sup>

5

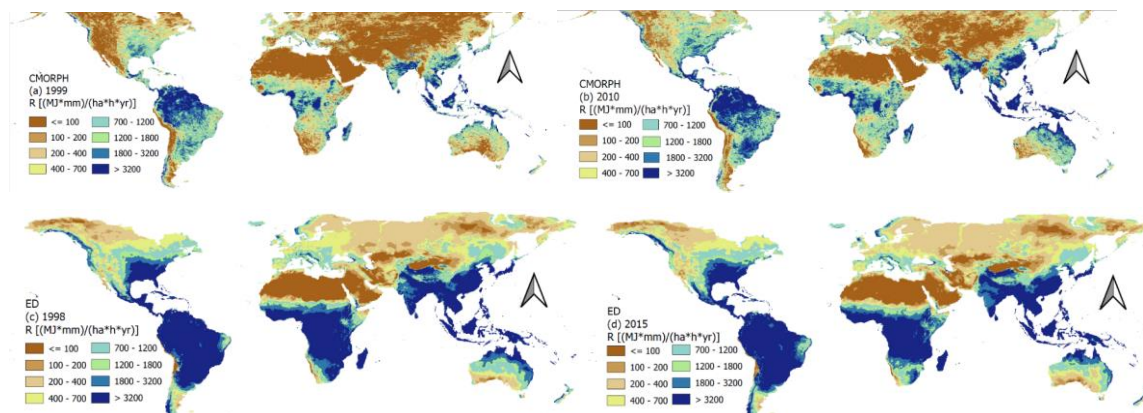

Figure S1: Annual rainfall erosivity extreme years. Maximum (a) and minimum (b) for the CMORPH; maximum (c) and minimum (d) for the ED.

10

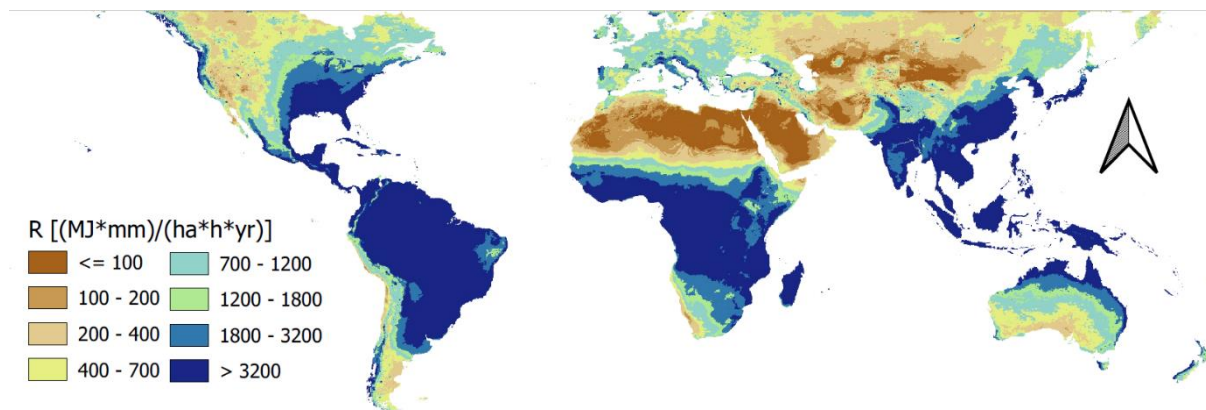

Figure S2: Corrected global rainfall erosivity map (CMORPH<sub>COR</sub>) based on the CMORPH data with the consideration of the GloREDa for the 1998-2019 period.

15

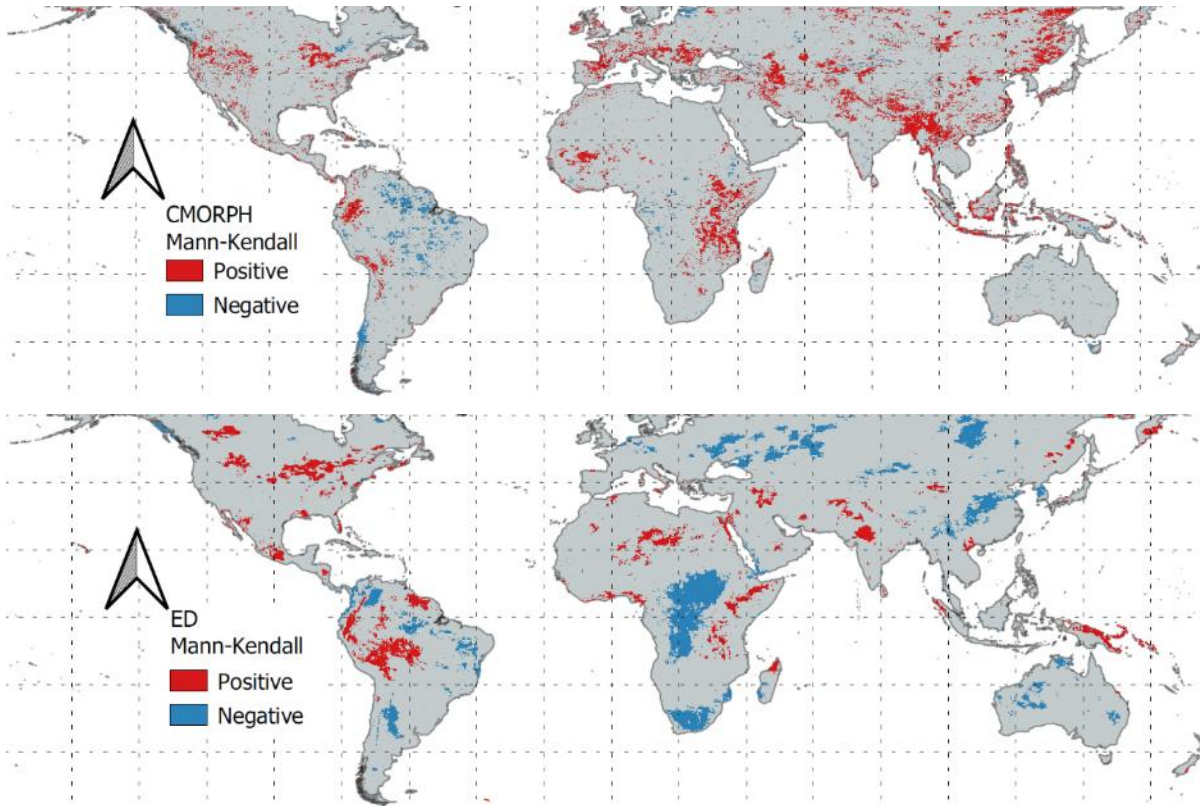

**Figure S3: Statistically significant (0.05 significance level) Mann-Kendall trend results using annual rainfall erosivity values for all grid cells covered by CMORPH (1998-2019). Statistically significant trend results using CMORPH and ED concept are shown. Non-significant results were not shown. Dotted lines indicate longitude and latitude lines separated by 20 degrees.**

20
